# Supplementary material for: The involvement of PybZIPa in light-induced anthocyanin accumulation via the activation of PyUFGT through binding to tandem G-boxes in its promoter
Source: PubMed Central journal article supplement (PMC6885052; doi:10.1038/s41438-019-0217-4), 2019-12-01
Supplement: 41438_2019_217_MOESM1_ESM.pdf [file 41438_2019_217_MOESM1_ESM.pdf]

**Table S1. Primers used in this study.**

| Primer used                  | Name                                     | Forward primer (5' to 3')                                 | Reverse primer (5' to 3')                     |
|------------------------------|------------------------------------------|-----------------------------------------------------------|-----------------------------------------------|
| For qPCR                     | <i>Tub</i> (reference gene)              | TGGGCTTTGCTCCTCTTAC                                       | CCTTCGTGCTCATCTTACC                           |
|                              | <i>PybZIPa</i>                           | CTACAATCGCAAATGCCACC                                      | CACCCTGTTCTTAGCAATCTC                         |
|                              | <i>PyCHI</i>                             | AAGGATTCGTCATCACAT                                        | GTCCCACCCAAATACCAT                            |
|                              | <i>PyF3'H</i>                            | CCACATCTAGCCGTTGA                                         | CCCACAGTTAGGGTCTC                             |
|                              | <i>PyANS</i>                             | AAGTATGCCAATGACCAGG                                       | GCTCTTCAAGTCCACCAAC                           |
|                              | <i>PyUFGT</i>                            | CCCGTTGTCGGTGTGTT                                         | ATCCGCATAGTCGCTTGG                            |
|                              | <i>PyMYB114</i>                          | CAAAAGCCACATCCGTCATAA                                     | AGGTCTTCCCCTAACCTAAACT                        |
|                              | <i>PyMYB10</i>                           | CACAAACGTCGTCGTCACAAA                                     | CCGACAGTCGATCATCAAACC                         |
|                              | <i>PyBBX22</i>                           | AAGGTTACAAAAGCGAATAAGC                                    | GAAGACGCCCAACACAA                             |
| For overexpression vector    | <i>pSAK277</i> (sequencing primer)       | CATCGAAAGGACAGTAGAAAAGG                                   | CATTAGAATGAACCGAAACCG                         |
|                              | <i>pSAK-PybZIPa</i>                      | actagtgatccaaagaattcATGTCAGTCCCAATCAGAGC                  | tcattaagcaggactctagaCTTAACTGATCCTTGC          |
| For subcellular localization | <i>GFP</i> (sequencing primer)           | TCCACTGACGTAAGGGATG                                       | CGTCGTCCTGAAGAAGATG                           |
|                              | <i>PybZIPa-GFP</i>                       | gagaacacgggggactctagaATGTCAGTCCCAATCAGAGCAGG              | gcccttctcaccatggatccCTTAACTGATCCTTGTCTTTGCTCG |
| For dual luciferase assay    | <i>0800-proCHI</i>                       | gtcgacggtatcgataagcttCAGCACGGAGGAGTTTCT                   | agaactagtgatccccgggCATCTTTGCACCTGTTTCG        |
|                              | <i>0800-proANS</i>                       | gtcgacggtatcgataagcttCAATAGGCTACCAATAACG                  | agaactagtgatccccgggACCCACCAGACTTTTCATC        |
|                              | <i>0800-proUFGT</i>                      | gtcgacggtatcgataagcttCCTTGTGGGTAATGGTTT                   | agaactagtgatccccgggAAATAACAGTGGGACCTA         |
|                              | <i>0800-proMYB114</i>                    | gtcgacggtatcgataagcttTCATTAATAAATTGCTAATTACATTCTTAATATT   | agaactagtgatccccgggTATTCCCAGCAAATTACTATCCTCC  |
|                              | <i>0800-proMYB10</i>                     | gtcgacggtatcgataagcttAGTTAGTAGAATTATCTAAATATCTCTAACATGATG | agaactagtgatccccgggCTCGTATCTGCTAGCAGCTAAGCT   |
|                              | <i>0800-proBBX22</i>                     | gtcgacggtatcgataagcttGTCGAAAATTGATAGGTGTGTGTGA            | agaactagtgatccccgggCGGGGAGGATCCTGTTGACA       |
|                              | <i>0800-probZIPa</i>                     | gtcgacggtatcgataagcttTCTTTTACATTGAAAAGGCCTTTCC            | agaactagtgatccccgggGGCTGGCTTATGAGCTCTCTCTC    |
| For yeast one-hybrid assay   | <i>pAbAi-vector</i> (sequencing primer)  | TTCAAGGAAACCGAAATCA                                       | TATGCTACAAAGGACCTAAT                          |
|                              | <i>pGADT7-vector</i> (sequencing primer) | TAATACGACTCACTATAGGGC                                     | AGATGGTGACGATGCACAG                           |
|                              | <i>pGAD-PybZIPa</i>                      | ggccagtgaattccacccgggATGTCAGTCCCAATCAGAGC                 | acgattcatctgcagctcgagCTTAACTGATCCTTGC         |
|                              | <i>pABAi-proUFGT-G-box</i>               | cttgaattcgagctcgggtaccGTGGTAATCAAGGAACACG                 | atacagagcacatgcctcgagTGCGGTTGAGATTTCCAGTT     |
|                              | <i>pABAi-proMYB114-G-box</i>             | cttgaattcgagctcgggtaccATCTTGCCTAGCAAGTATTATGGTGC          | atacagagcacatgcctcgagGGGGAAATTTTAGAGAAAGAGAAA |
|                              | <i>pABAi-proMYB10-G-box</i>              | cttgaattcgagctcgggtaccCTGCCTTCACATTCATAGAATGTGC           | atacagagcacatgcctcgagGGGGAAATTTTAGAGAAAGAGAAA |
|                              | <i>pABAi-proBBX22-G-box</i>              | cttgaattcgagctcgggtaccGTCGAAAATTGATAGGTGTGTGTGA           | atacagagcacatgcctcgagCGGGGAGGATCCTGTTGACA     |
|                              | <i>pABAi-probZIPa-G-box</i>              | cttgaattcgagctcgggtaccACTTGCAATATGTACATATTTTTACTTAGG      | atacagagcacatgcctcgagAACTAGTGGATCCCCGGG       |

Note: The lowercase letters represent the restriction sites and homologous recombination arm for different vector constructions.

**Table S2.** Interaction value between metabolites and genes

| ID-1                                           | ID-2        | Pearson     | <i>p</i> -value |
|------------------------------------------------|-------------|-------------|-----------------|
| Kaempferol 4'-rhamnoside                       | Pbr020478.1 | 0.999998848 | 6.04E-05        |
| Kaempferol 4'-rhamnoside                       | Pbr040222.1 | 0.999994193 | 0.000135603     |
| Kaempferol 4'-rhamnoside                       | Pbr014872.1 | 0.999978767 | 0.000259285     |
| Kaempferol 4'-rhamnoside                       | Pbr030373.1 | 0.999976205 | 0.000274485     |
| Kaempferol 4'-rhamnoside                       | Pbr035932.1 | 0.999963003 | 0.000342261     |
| Kaempferol 4'-rhamnoside                       | Pbr015347.1 | 0.999959088 | 0.000359918     |
| Kaempferol 4'-rhamnoside                       | Pbr023848.1 | 0.999945847 | 0.000414086     |
| Kaempferol 4'-rhamnoside                       | Pbr003806.1 | 0.999919611 | 0.000504518     |
| Kaempferol 4'-rhamnoside                       | Pbr014148.1 | 0.999900839 | 0.000560337     |
| Kaempferol 4'-rhamnoside                       | Pbr003780.1 | 0.999842685 | 0.000705774     |
| 6-Hydroxykaempferol 3-methyl ether 6-glucoside | Pbr007194.1 | 0.999980399 | 0.000249126     |
| 6-Hydroxykaempferol 3-methyl ether 6-glucoside | Pbr007004.1 | 0.999972155 | 0.000296928     |
| 6-Hydroxykaempferol 3-methyl ether 6-glucoside | Pbr025647.1 | 0.999969673 | 0.000309879     |
| 6-Hydroxykaempferol 3-methyl ether 6-glucoside | Novel00072  | 0.999961585 | 0.000348758     |
| 6-Hydroxykaempferol 3-methyl ether 6-glucoside | Pbr035967.1 | 0.99992632  | 0.000483005     |
| 6-Hydroxykaempferol 3-methyl ether 6-glucoside | Pbr032910.1 | 0.999882153 | 0.000610856     |
| 6-Hydroxykaempferol 3-methyl ether 6-glucoside | Pbr009585.1 | 0.999834762 | 0.000723329     |
| 6-Hydroxykaempferol 3-methyl ether 6-glucoside | Pbr019926.1 | 0.999822341 | 0.000750023     |
| 6-Hydroxykaempferol 3-methyl ether 6-glucoside | Pbr021355.1 | 0.999812258 | 0.000771015     |
| 6-Hydroxykaempferol 3-methyl ether 6-glucoside | Pbr033501.1 | 0.982752663 | 0.007400522     |
| Cyanidin 3-(6-malylglucoside)                  | Pbr005128.2 | 0.999981177 | 0.000244129     |
| Cyanidin 3-(6-malylglucoside)                  | Pbr008923.1 | 0.999845048 | 0.000700454     |
| Cyanidin 3-(6-malylglucoside)                  | Pbr038552.1 | 0.999731606 | 0.000921873     |
| Cyanidin 3-(6-malylglucoside)                  | Pbr015483.1 | 0.999720292 | 0.000941105     |
| Cyanidin 3-(6-malylglucoside)                  | Pbr013884.1 | 0.999633493 | 0.001077282     |
| Cyanidin 3-(6-malylglucoside)                  | Pbr040794.1 | 0.999492528 | 0.00126765      |
| Cyanidin 3-(6-malylglucoside)                  | Pbr039999.1 | 0.999475235 | 0.00128907      |
| Cyanidin 3-(6-malylglucoside)                  | Novel00370  | 0.948484846 | 0.012826994     |
| Cyanidin 3-(6-malylglucoside)                  | Pbr039972.1 | 0.934770085 | 0.014450672     |
| Cyanidin 3-(6-malylglucoside)                  | Pbr039986.1 | 0.903587387 | 0.01761549      |
| dimethoxyflavanone                             | Pbr019475.1 | 0.999996312 | 0.000108064     |
| dimethoxyflavanone                             | Pbr022226.1 | 0.999994444 | 0.00013264      |
| dimethoxyflavanone                             | Pbr030951.1 | 0.999972591 | 0.000294595     |
| dimethoxyflavanone                             | Pbr019219.1 | 0.999966008 | 0.000328069     |
| dimethoxyflavanone                             | Pbr029321.1 | 0.999898079 | 0.000568082     |
| dimethoxyflavanone                             | Pbr017718.1 | 0.999866379 | 0.000650455     |
| dimethoxyflavanone                             | Pbr029872.1 | 0.99984951  | 0.000690294     |
| dimethoxyflavanone                             | Pbr025648.1 | 0.999809836 | 0.000775971     |
| dimethoxyflavanone                             | Pbr031347.1 | 0.999773333 | 0.000847183     |
| dimethoxyflavanone                             | Pbr023137.1 | 0.999769353 | 0.000854589     |
| hexamethoxyflavone                             | Pbr004370.1 | 0.999994175 | 0.000135813     |
| hexamethoxyflavone                             | Pbr013303.1 | 0.999904549 | 0.000549755     |
| hexamethoxyflavone                             | Pbr035481.1 | 0.999724345 | 0.00093426      |
| hexamethoxyflavone                             | Pbr013256.1 | 0.999583494 | 0.00114842      |
| hexamethoxyflavone                             | Pbr035362.1 | 0.999172121 | 0.001619156     |
| hexamethoxyflavone                             | Pbr019804.1 | 0.999144212 | 0.001646225     |
| hexamethoxyflavone                             | Pbr029778.1 | 0.999082506 | 0.001704551     |
| hexamethoxyflavone                             | Pbr009096.1 | 0.998873619 | 0.001888681     |
| hexamethoxyflavone                             | Pbr028053.1 | 0.998659769 | 0.002060219     |
| hexamethoxyflavone                             | Pbr042065.1 | 0.998414798 | 0.002240654     |
| Kaempferol 3-glucuronide                       | Pbr023304.1 | 0.999987714 | 0.000197231     |
| Kaempferol 3-glucuronide                       | Pbr035573.1 | 0.999963067 | 0.000341968     |
| Kaempferol 3-glucuronide                       | Pbr032572.1 | 0.999961943 | 0.00034713      |

|                                             |             |             |             |
|---------------------------------------------|-------------|-------------|-------------|
| Kaempferol 3-glucuronide                    | Pbr010756.1 | 0.999946231 | 0.000412613 |
| Kaempferol 3-glucuronide                    | Pbr039023.1 | 0.999887389 | 0.000597132 |
| Kaempferol 3-glucuronide                    | Pbr017028.1 | 0.999866412 | 0.000650375 |
| Kaempferol 3-glucuronide                    | Pbr030955.1 | 0.999862457 | 0.000659933 |
| Kaempferol 3-glucuronide                    | Pbr015168.1 | 0.99984823  | 0.000693225 |
| Kaempferol 3-glucuronide                    | Pbr003752.1 | 0.978390428 | 0.008286734 |
| Kaempferol 3-glucuronide                    | Pbr033501.1 | 0.997832495 | 0.002620195 |
| Quercetin 3-O-glucoside                     | Pbr000582.1 | 0.949467001 | 0.01270307  |
| Quercetin 3-O-glucoside                     | Pbr003752.1 | 0.913168579 | 0.016703496 |
| Quercetin 3-O-glucoside                     | Pbr021057.1 | 0.992808611 | 0.004774656 |
| Quercetin 3-O-glucoside                     | Pbr010673.1 | 0.984257157 | 0.007069491 |
| Quercetin 3-O-glucoside                     | Pbr001279.1 | 0.966166812 | 0.010379555 |
| Quercetin 3-O-glucoside                     | Pbr031407.1 | 0.936556729 | 0.014249223 |
| Quercetin 3-O-glucoside                     | Pbr030848.1 | 0.998861317 | 0.001898969 |
| Quercetin 3-O-glucoside                     | Pbr039986.1 | 0.941851634 | 0.013635503 |
| Quercetin 3-O-glucoside                     | Pbr039972.1 | 0.912174043 | 0.01680032  |
| Quercetin 3-O-glucoside                     | Pbr002375.1 | 0.971967763 | 0.0094433   |
| 6-Methoxykaempferol 3-(6-acetylglucoside)   | Pbr003128.1 | 0.999968257 | 0.000317032 |
| 6-Methoxykaempferol 3-(6-acetylglucoside)   | Pbr031070.1 | 0.999959938 | 0.000356159 |
| 6-Methoxykaempferol 3-(6-acetylglucoside)   | Pbr004201.3 | 0.999784601 | 0.000825857 |
| 6-Methoxykaempferol 3-(6-acetylglucoside)   | Pbr041897.1 | 0.999769743 | 0.000853866 |
| 6-Methoxykaempferol 3-(6-acetylglucoside)   | Pbr033827.1 | 0.999748813 | 0.000891831 |
| 6-Methoxykaempferol 3-(6-acetylglucoside)   | Pbr004235.1 | 0.999660317 | 0.001037109 |
| 6-Methoxykaempferol 3-(6-acetylglucoside)   | Pbr020567.1 | 0.999650623 | 0.001051805 |
| 6-Methoxykaempferol 3-(6-acetylglucoside)   | Pbr017929.1 | 0.999327093 | 0.001459746 |
| 6-Methoxykaempferol 3-(6-acetylglucoside)   | Pbr012103.1 | 0.999172541 | 0.001618745 |
| 6-Methoxykaempferol 3-(6-acetylglucoside)   | Pbr038278.1 | 0.999030781 | 0.001751948 |
| 6-Hydroxydelphinidin 3-(6-malonylglucoside) | Pbr038278.1 | 0.999950326 | 0.00039659  |
| 6-Hydroxydelphinidin 3-(6-malonylglucoside) | Pbr042779.1 | 0.999941977 | 0.000428625 |
| 6-Hydroxydelphinidin 3-(6-malonylglucoside) | Pbr034311.1 | 0.999898057 | 0.000568143 |
| 6-Hydroxydelphinidin 3-(6-malonylglucoside) | Pbr017929.1 | 0.999850164 | 0.000688792 |
| 6-Hydroxydelphinidin 3-(6-malonylglucoside) | Pbr001290.1 | 0.999761557 | 0.000868912 |
| 6-Hydroxydelphinidin 3-(6-malonylglucoside) | Pbr042332.1 | 0.999715458 | 0.000949201 |
| 6-Hydroxydelphinidin 3-(6-malonylglucoside) | Pbr035938.1 | 0.999658021 | 0.001040608 |
| 6-Hydroxydelphinidin 3-(6-malonylglucoside) | Pbr004235.1 | 0.999609892 | 0.001111429 |
| 6-Hydroxydelphinidin 3-(6-malonylglucoside) | Pbr031120.1 | 0.999600034 | 0.001125385 |
| 6-Hydroxydelphinidin 3-(6-malonylglucoside) | Pbr038777.3 | 0.999587938 | 0.001142276 |
| Apigenin 7-(6-malonylglucoside)             | Pbr006275.1 | 0.999998293 | 7.35E-05    |
| Apigenin 7-(6-malonylglucoside)             | Pbr007711.1 | 0.999909802 | 0.000534413 |
| Apigenin 7-(6-malonylglucoside)             | Pbr037476.1 | 0.999907631 | 0.000540805 |
| Apigenin 7-(6-malonylglucoside)             | Pbr015252.1 | 0.999879256 | 0.000618319 |
| Apigenin 7-(6-malonylglucoside)             | Pbr019167.1 | 0.999835324 | 0.000722098 |
| Apigenin 7-(6-malonylglucoside)             | Pbr013387.1 | 0.999822935 | 0.000748769 |
| Apigenin 7-(6-malonylglucoside)             | Pbr031010.1 | 0.999808473 | 0.000778748 |
| Apigenin 7-(6-malonylglucoside)             | Pbr012355.1 | 0.999791511 | 0.000812502 |
| Apigenin 7-(6-malonylglucoside)             | Pbr037470.1 | 0.999634578 | 0.001075687 |
| Apigenin 7-(6-malonylglucoside)             | Pbr041824.1 | 0.999297333 | 0.001491679 |
| prenylflavanone                             | Pbr030184.1 | 0.999997853 | 8.25E-05    |
| prenylflavanone                             | Pbr026905.1 | 0.999994442 | 0.000132664 |
| prenylflavanone                             | Pbr038288.1 | 0.999971811 | 0.000298753 |
| prenylflavanone                             | Pbr029842.1 | 0.99996418  | 0.000336775 |
| prenylflavanone                             | Pbr039230.1 | 0.99994411  | 0.000420672 |
| prenylflavanone                             | Pbr022800.1 | 0.999915488 | 0.000517295 |
| prenylflavanone                             | Pbr019343.1 | 0.999914042 | 0.000521701 |
| prenylflavanone                             | Pbr038211.1 | 0.999908103 | 0.000539421 |

|                                    |             |             |             |
|------------------------------------|-------------|-------------|-------------|
| prenylflavanone                    | Pbr013360.1 | 0.999829599 | 0.000734543 |
| prenylflavanone                    | Pbr033727.1 | 0.99051805  | 0.005483625 |
| Quercetin 3-xyloside-7-glucoside   | Pbr041904.1 | 0.999999651 | 3.33E-05    |
| Quercetin 3-xyloside-7-glucoside   | Pbr040178.1 | 0.999999118 | 5.28E-05    |
| Quercetin 3-xyloside-7-glucoside   | Pbr020773.1 | 0.999923193 | 0.000493148 |
| Quercetin 3-xyloside-7-glucoside   | Pbr034768.1 | 0.999917428 | 0.000511324 |
| Quercetin 3-xyloside-7-glucoside   | Pbr024972.1 | 0.999786824 | 0.000821584 |
| Quercetin 3-xyloside-7-glucoside   | Pbr018708.1 | 0.999782959 | 0.000828998 |
| Quercetin 3-xyloside-7-glucoside   | Pbr038099.1 | 0.999688184 | 0.000993655 |
| Quercetin 3-xyloside-7-glucoside   | Pbr036221.1 | 0.999551111 | 0.001192232 |
| Quercetin 3-xyloside-7-glucoside   | Pbr000414.1 | 0.999483603 | 0.00127875  |
| Quercetin 3-xyloside-7-glucoside   | Pbr033501.1 | 0.962135109 | 0.010984328 |
| Quercetin 3-(2-glucosylrhamnoside) | Pbr000498.1 | 0.99999749  | 8.92E-05    |
| Quercetin 3-(2-glucosylrhamnoside) | Pbr028471.1 | 0.999994227 | 0.000135204 |
| Quercetin 3-(2-glucosylrhamnoside) | Pbr042698.1 | 0.999993525 | 0.000143182 |
| Quercetin 3-(2-glucosylrhamnoside) | Pbr022330.1 | 0.999992276 | 0.000156383 |
| Quercetin 3-(2-glucosylrhamnoside) | Pbr003581.1 | 0.999984798 | 0.000219394 |
| Quercetin 3-(2-glucosylrhamnoside) | Pbr021355.1 | 0.999949296 | 0.000400682 |
| Quercetin 3-(2-glucosylrhamnoside) | Pbr019926.1 | 0.999943844 | 0.000421673 |
| Quercetin 3-(2-glucosylrhamnoside) | Pbr009585.1 | 0.999936509 | 0.000448368 |
| Quercetin 3-(2-glucosylrhamnoside) | Pbr003752.1 | 0.908686872 | 0.017135755 |
| Quercetin 3-(2-glucosylrhamnoside) | Pbr033501.1 | 0.987771452 | 0.006228825 |
| Petunin                            | Pbr004849.1 | 0.999999934 | 1.44E-05    |
| Petunin                            | Pbr020363.1 | 0.999999697 | 3.10E-05    |
| Petunin                            | Pbr040057.1 | 0.999997347 | 9.16E-05    |
| Petunin                            | Pbr023911.1 | 0.999993665 | 0.000141629 |
| Petunin                            | Pbr041968.1 | 0.99997611  | 0.000275033 |
| Petunin                            | Pbr031922.1 | 0.999976003 | 0.000275646 |
| Petunin                            | Pbr016970.1 | 0.999968231 | 0.000317161 |
| Petunin                            | Pbr016506.1 | 0.999964724 | 0.000334207 |
| Petunin                            | Novel00448  | 0.999961311 | 0.000350003 |
| Petunin                            | Pbr000218.1 | 0.991210505 | 0.005279292 |
| Quercetin-glucoside                | Pbr017672.1 | 0.999992371 | 0.000155425 |
| Quercetin-glucoside                | Pbr014325.1 | 0.999989248 | 0.000184512 |
| Quercetin-glucoside                | Pbr024458.1 | 0.999914465 | 0.000520414 |
| Quercetin-glucoside                | Pbr022187.1 | 0.999830318 | 0.000732991 |
| Quercetin-glucoside                | Pbr000452.1 | 0.999819315 | 0.000756384 |
| Quercetin-glucoside                | Pbr009881.1 | 0.999815262 | 0.000764821 |
| Quercetin-glucoside                | Pbr005912.1 | 0.999792364 | 0.000810838 |
| Quercetin-glucoside                | Pbr002886.1 | 0.999774284 | 0.000845405 |
| Quercetin-glucoside                | Pbr029551.1 | 0.999770194 | 0.000853029 |
| Quercetin-glucoside                | Pbr031958.1 | 0.991223616 | 0.005275348 |
| Cyanidin-malonylglucoside          | Pbr023911.1 | 0.999999601 | 3.55E-05    |
| Cyanidin-malonylglucoside          | Pbr020363.1 | 0.999998218 | 7.51E-05    |
| Cyanidin-malonylglucoside          | Pbr004849.1 | 0.999995413 | 0.000120519 |
| Cyanidin-malonylglucoside          | Pbr040057.1 | 0.999987649 | 0.000197753 |
| Cyanidin-malonylglucoside          | Pbr016506.1 | 0.999983567 | 0.000228102 |
| Cyanidin-malonylglucoside          | Pbr020016.1 | 0.999963146 | 0.000341602 |
| Cyanidin-malonylglucoside          | Pbr041968.1 | 0.999954121 | 0.000381139 |
| Cyanidin-malonylglucoside          | Pbr031922.1 | 0.999953973 | 0.000381752 |
| Cyanidin-malonylglucoside          | Pbr016970.1 | 0.999943419 | 0.000423267 |
| Cyanidin-malonylglucoside          | Pbr000218.1 | 0.990854189 | 0.005385398 |

**Table S3. Comparative analysis of protein property**

| Gene ID                                | Pbr002622.1                                                                         | Pbr027818.1                                                                         | <i>PybZIPa</i>                                                                       |       |
|----------------------------------------|-------------------------------------------------------------------------------------|-------------------------------------------------------------------------------------|--------------------------------------------------------------------------------------|-------|
| Formula                                | C <sub>759</sub> H <sub>1283</sub> N <sub>253</sub> O <sub>268</sub> S <sub>3</sub> | C <sub>735</sub> H <sub>1239</sub> N <sub>245</sub> O <sub>261</sub> S <sub>3</sub> | C <sub>1033</sub> H <sub>1680</sub> N <sub>318</sub> O <sub>353</sub> S <sub>5</sub> |       |
| Mw                                     | 18337.25                                                                            | 17780.59                                                                            | 24362.92                                                                             |       |
| Theoretical pI                         | 9.34                                                                                | 9                                                                                   | 5.58                                                                                 |       |
| Instability index                      | 55.72                                                                               | 53.2                                                                                | 58.95                                                                                |       |
| Aliphatic index                        | 70.59                                                                               | 68.54                                                                               | 68.85                                                                                |       |
| GRAVY                                  | -0.931                                                                              | -0.984                                                                              | -1.036                                                                               |       |
| Signal peptide                         | No                                                                                  | No                                                                                  | No                                                                                   |       |
| Number of phosphorylation sites        | 24                                                                                  | 23                                                                                  | 26                                                                                   |       |
| Alpha helix (%)                        | 55.03                                                                               | 48.17                                                                               | 37.16                                                                                |       |
| Protein secondary structure prediction | Random coil (%)                                                                     | 42.6                                                                                | 45.12                                                                                | 47.25 |
| Extended strand (%)                    | 1.18                                                                                | 2.44                                                                                | 14.22                                                                                |       |
| Beta turn (%)                          | 1.18                                                                                | 4.27                                                                                | 1.38                                                                                 |       |
| Transmembrane prediction               | No                                                                                  | No                                                                                  | No                                                                                   |       |

**Instability index > 40, the protein is probably unstable; GRAVY < 0, the protein is probably hydrophilous.**

Note: pI, isoelectric point; Mw, molecular weight; GRAVY, Grand average of hydropathicity. Protein property analysis was used ExPASy ProtParam tool (<https://web.expasy.org/protparam/>), ProtScale (<http://web.expasy.org/protscale/>), SignalP 4.1 server (<http://www.cbs.dtu.dk/services/SignalP/>), NetPhos 2.0 Server (<http://www.cbs.dtu.dk/services/NetPhos/>) and Scratch Protein Predictor-DIpro (<http://scratch.proteomics.ics.uci.edu/>). Protein secondary structure prediction was used PBIL LYON-GERLAND ([https://npsa-prabi.ibcp.fr/cgi-bin/npsa\\_automat.pl?page=/NPSA/npsa\\_hnn.html](https://npsa-prabi.ibcp.fr/cgi-bin/npsa_automat.pl?page=/NPSA/npsa_hnn.html)), transmembrane prediction was used TMHMM server v. 2.0 (<http://genome.cbs.dtu.dk/services/TMHMM/>).

**Table S4.** Correlation analysis of expression patterns

| ID1            | ID2             | pearsonr    |
|----------------|-----------------|-------------|
| <i>PybZIPa</i> | <i>PyMYB114</i> | 0.858792204 |
| <i>PybZIPa</i> | <i>PyMYB10</i>  | 0.799350935 |
| <i>PybZIPa</i> | <i>PyBBX22</i>  | 0.769090018 |
| <i>PybZIPa</i> | <i>PyCHI</i>    | 0.778885835 |
| <i>PybZIPa</i> | <i>PyF3'H</i>   | 0.827941627 |
| <i>PybZIPa</i> | <i>PyANS</i>    | 0.885189748 |
| <i>PybZIPa</i> | <i>PyUFGT</i>   | 0.927060622 |
