# Supplementary material for: The involvement of PybZIPa in light-induced anthocyanin accumulation via the activation of PyUFGT through binding to tandem G-boxes in its promoter
Source: PubMed Central journal article supplement (PMC6885052; doi:10.1038/s41438-019-0217-4), 2019-12-01
Supplement: 41438_2019_217_MOESM2_ESM.pdf [file 41438_2019_217_MOESM2_ESM.pdf]

Fig. S1

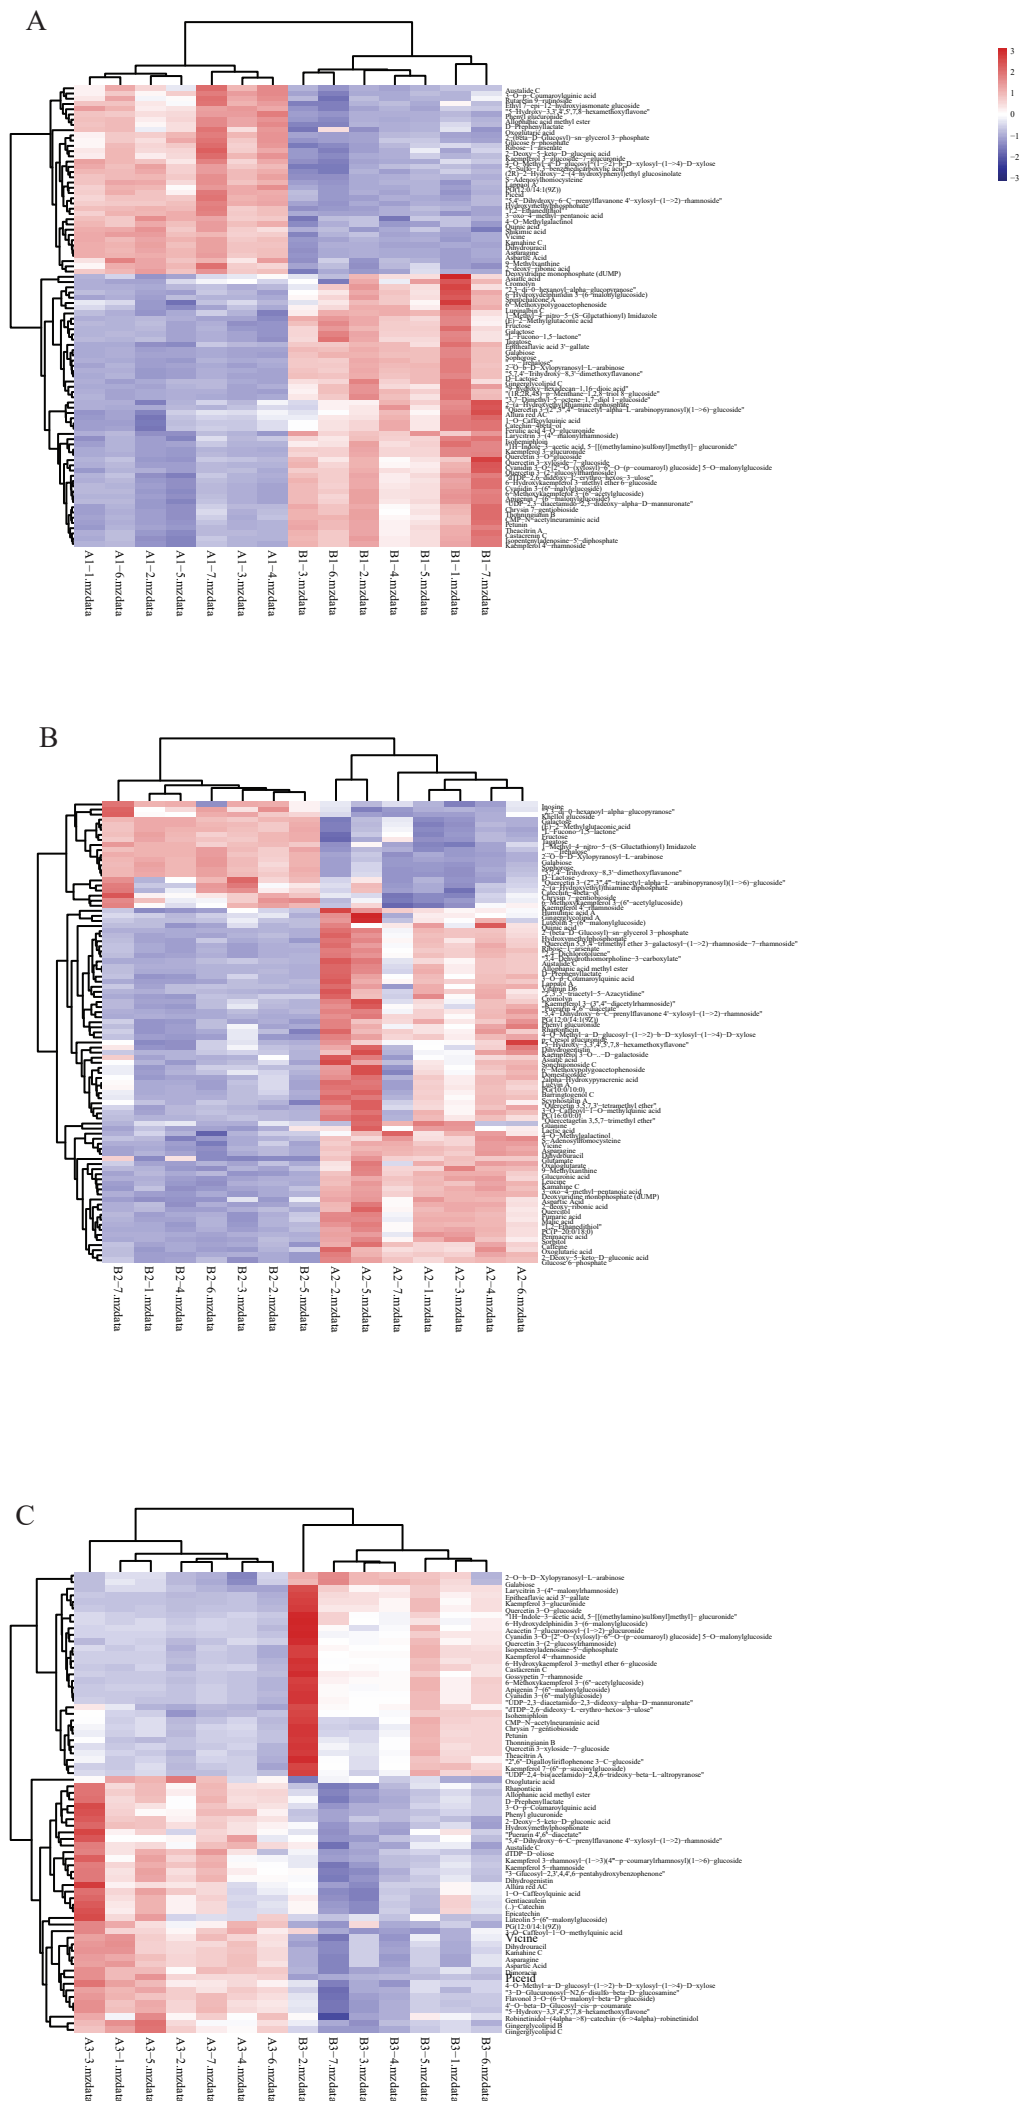

Fig. S2

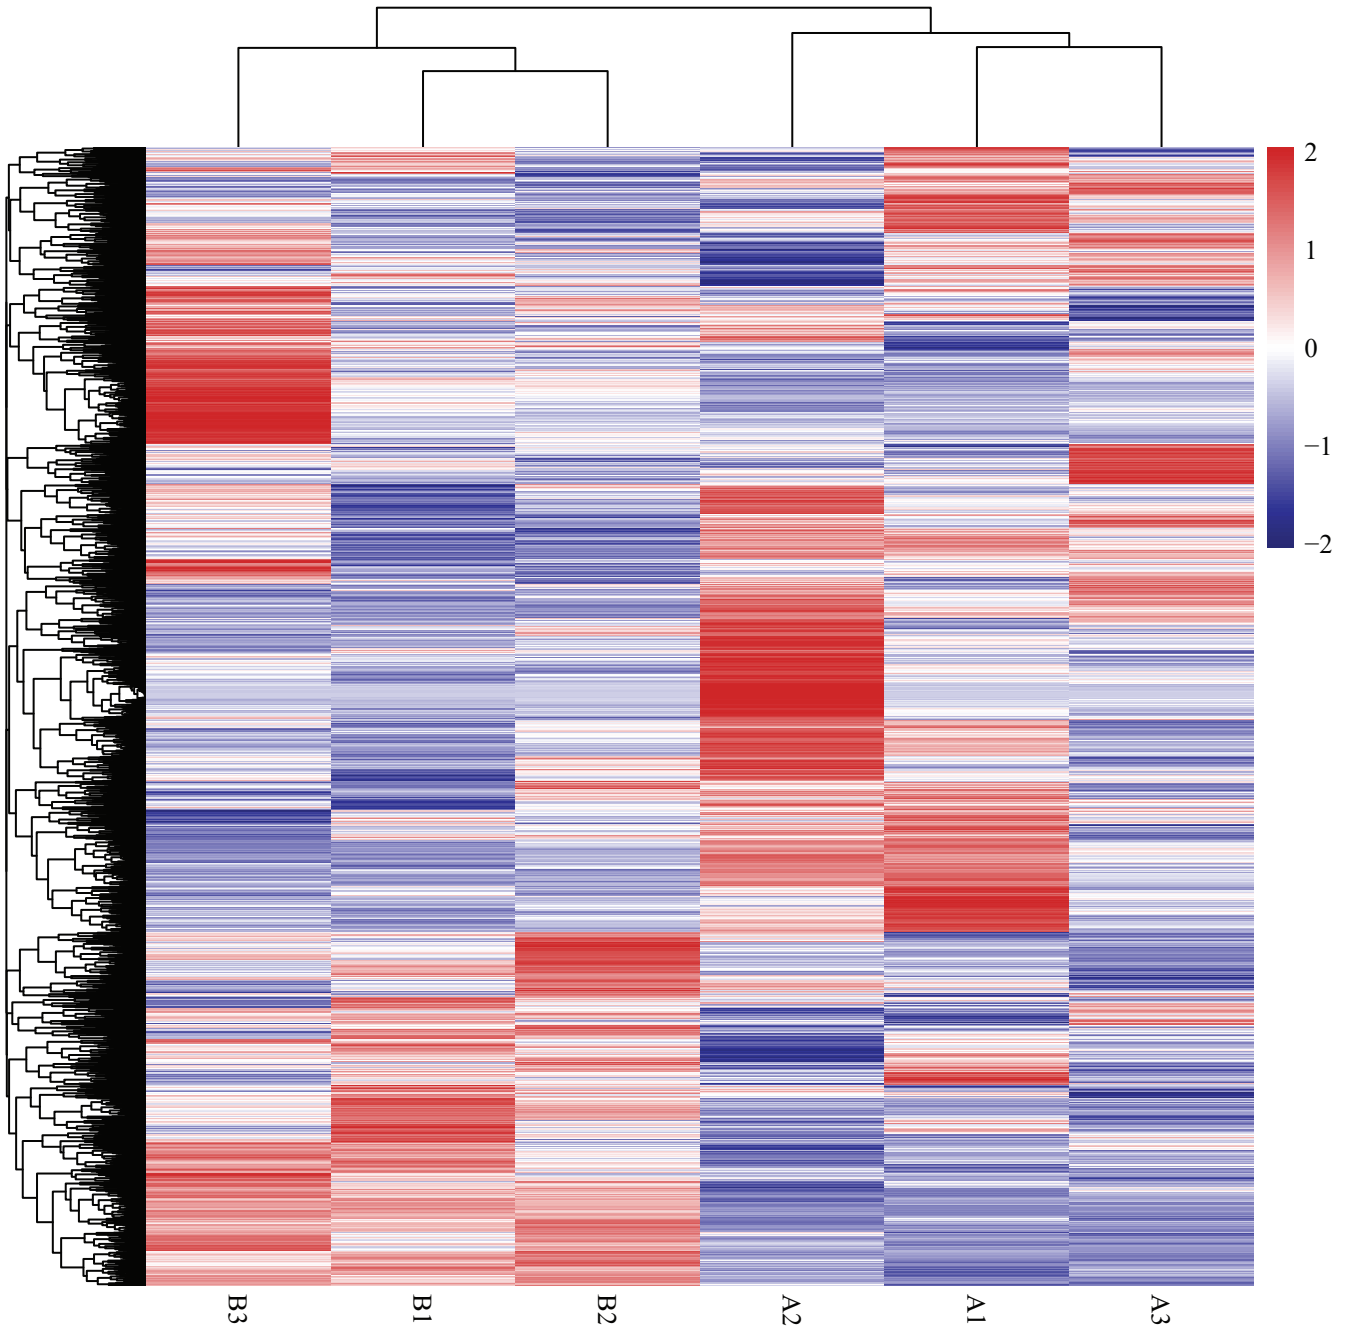

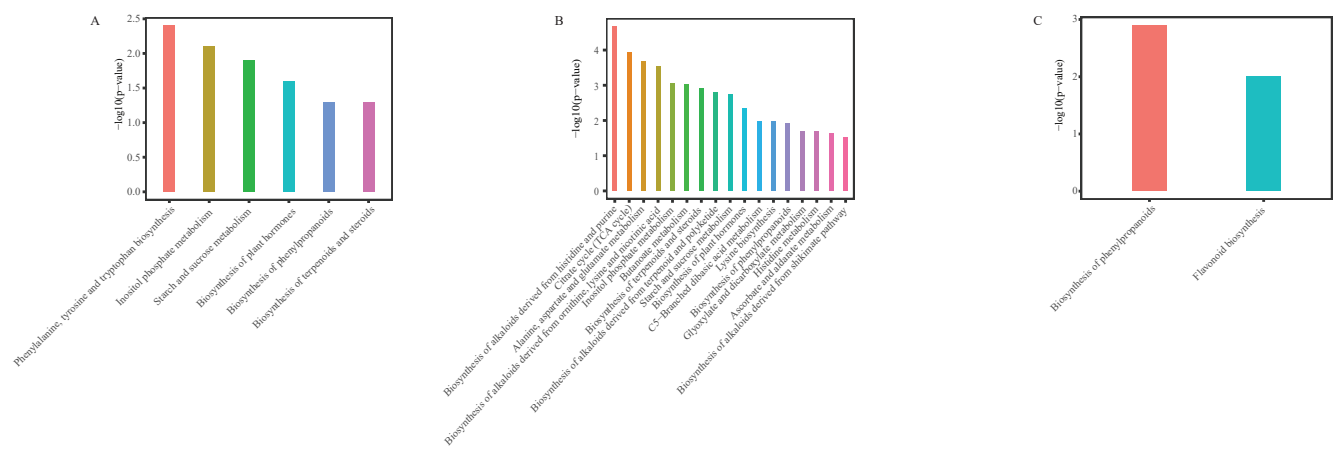

Fig. S4

Go enrichment analysis on the common DEGs

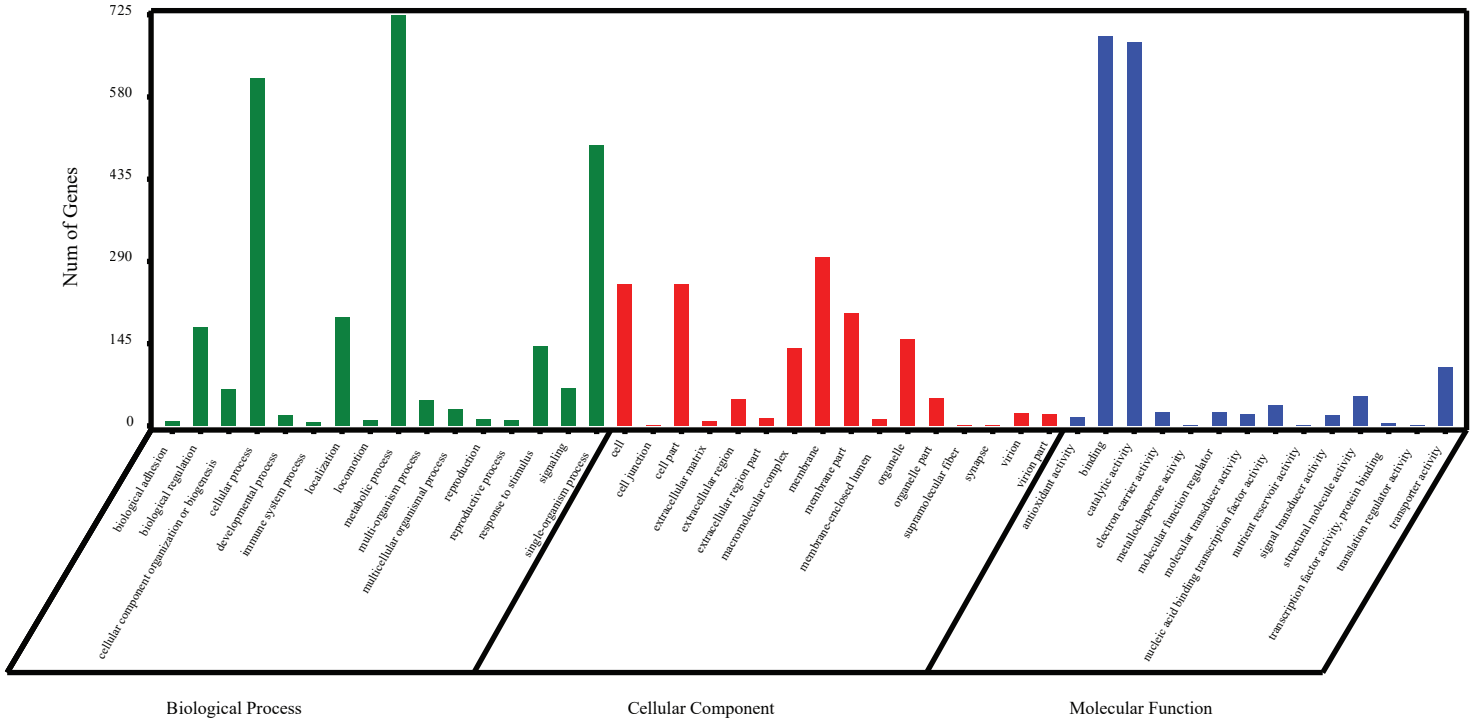

A

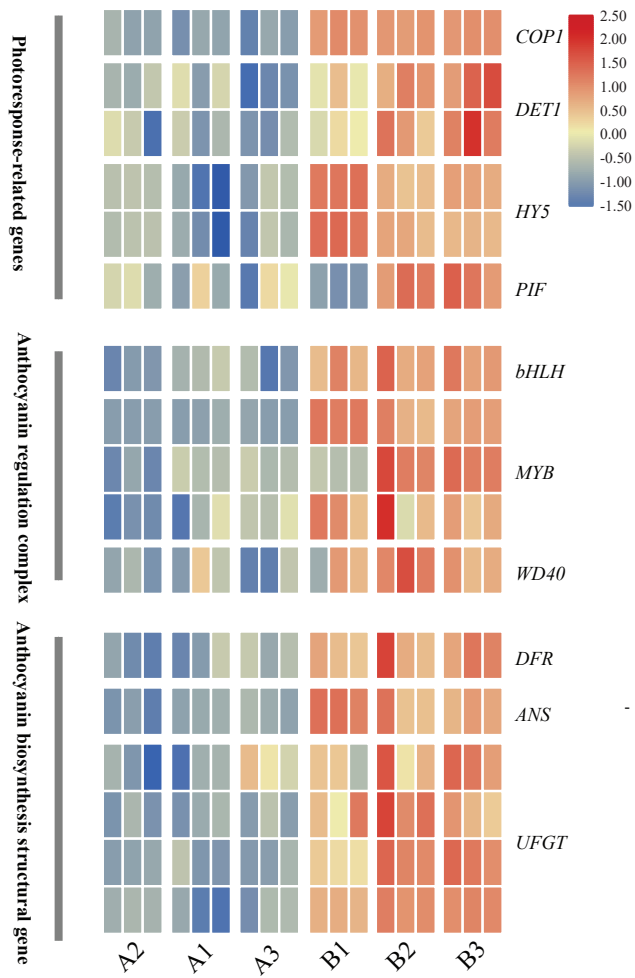

B

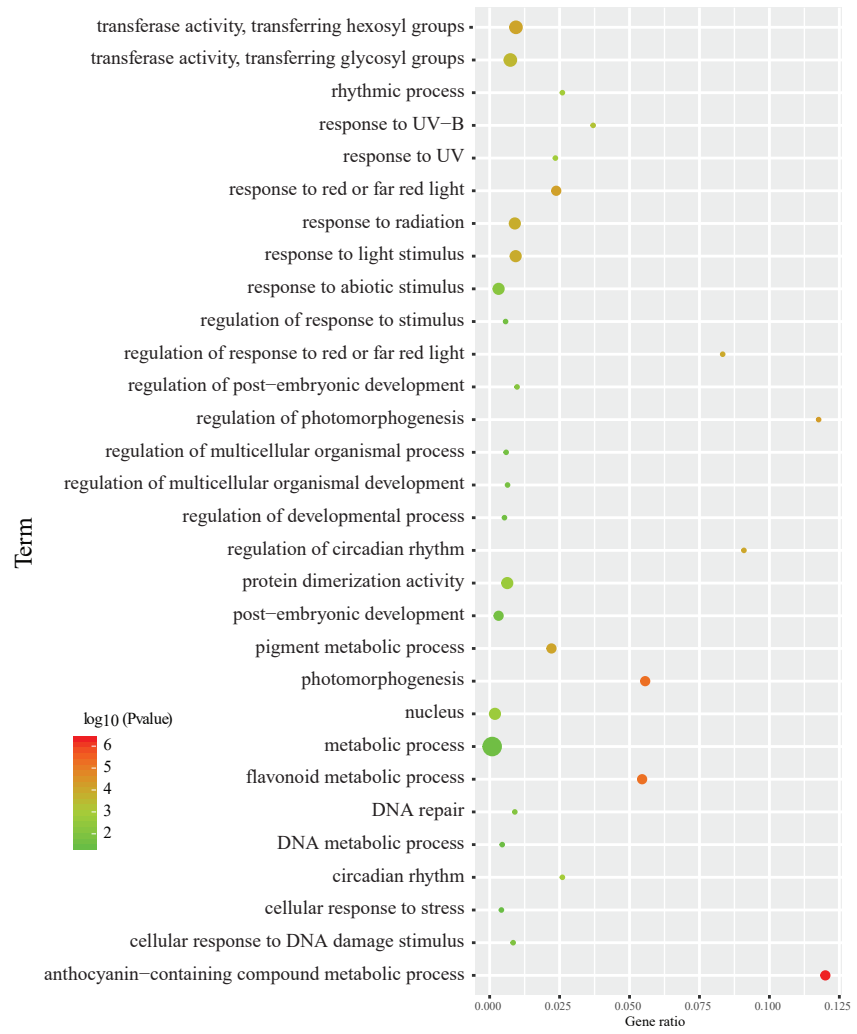

Fig.S5
